# Supplementary material
Source: PubMed Central journal article supplement (PMC532009)
Supplement: mbc_E04-07-0591_1.pdf [file mbc_E04-07-0591_1.pdf]

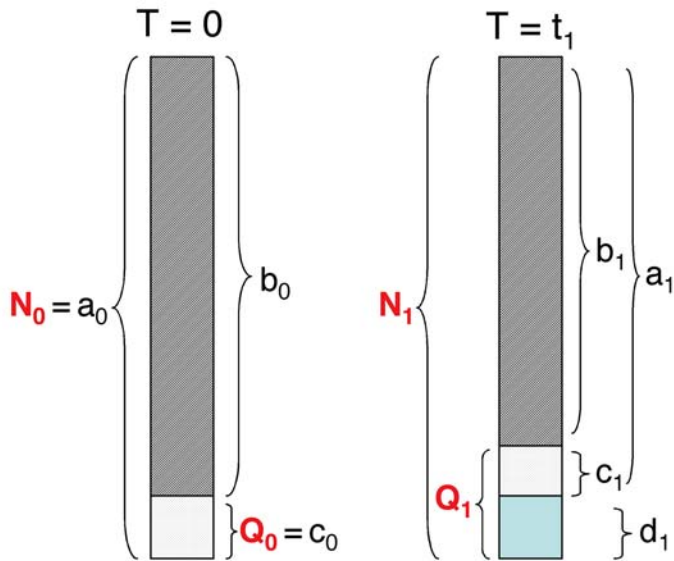

- = quenched surface (b)
- = residual surface (c)
- = internalized (d)

$$b_1 = a_1 - c_1 = N_1 - Q_1 \quad (1)$$

$$a_1 \left(1 - \frac{c_1}{a_1}\right) = N_1 - Q_1$$

$$a_1 = \frac{(N_1 - Q_1)}{\left(1 - \frac{c_1}{a_1}\right)} \quad (2)$$

assume  $\frac{c_1}{a_1} = \frac{c_0}{a_0} = \frac{Q_0}{N_0}$

$$a_1 = \frac{N_1 - Q_1}{\left(1 - \frac{Q_0}{N_0}\right)} \quad (3)$$

$$\frac{d_1}{N_1} = \frac{N_1 - a_1}{N_1} = 1 - \left( \frac{N_1 - Q_1}{N_1 - \left(\frac{N_1 Q_0}{N_0}\right)} \right) \quad (4)$$

$$\text{fraction internalized} = \left( \frac{d_1}{N} \right) = \left( \frac{Q_1 - Q_0}{N - Q_0} \right) \quad (5)$$

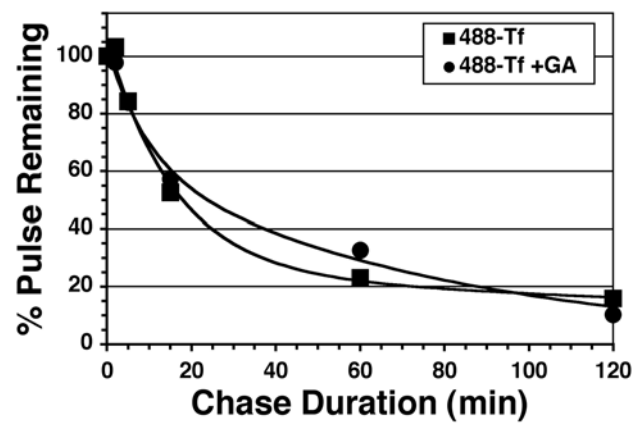

**A**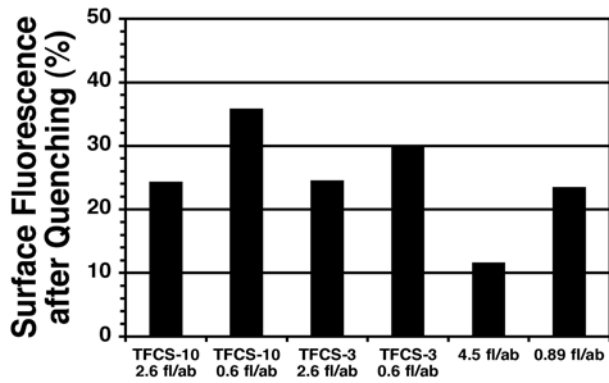**B**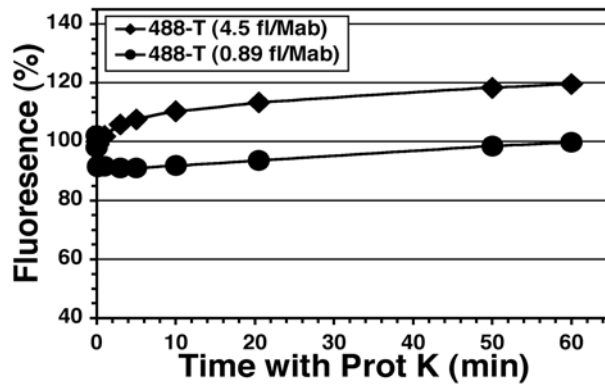**C**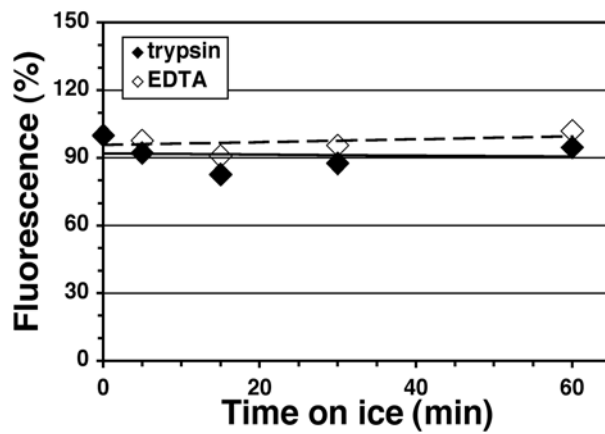

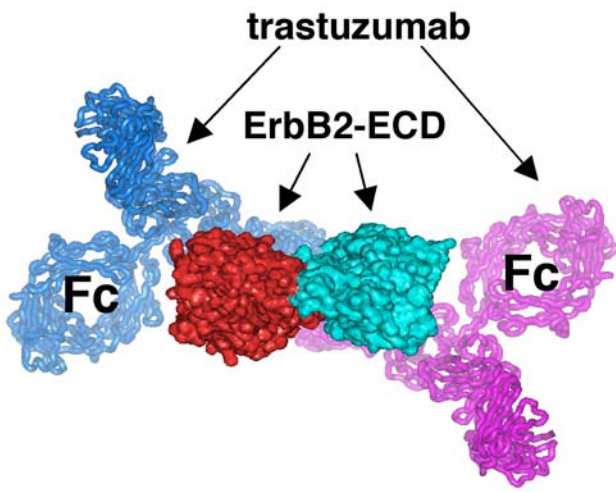

Top View

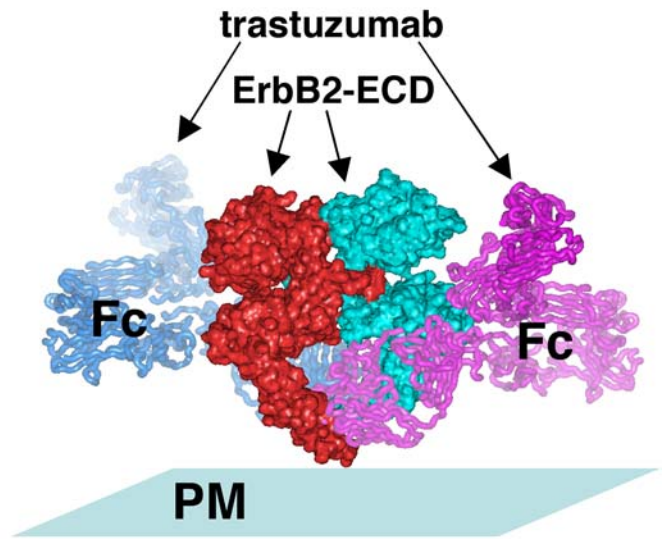

Lateral View
